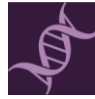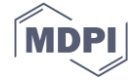

1 Article

## 2 **Structural characterization of covalently stabilized** 3 **human cystatin C oligomers**

4  
5  
6 **Magdalena Chrabaszczewska<sup>1,2</sup>, Adam K. Sieradzan<sup>3</sup>, Sylwia Rodziewicz-Motowidło<sup>3</sup>, Anders**  
7 **Grubb<sup>4</sup>, Christopher M. Dobson<sup>5,7</sup>, Janet R. Kumita<sup>5,6\*</sup> and Maciej Kozak<sup>1\*</sup>**

8

9 <sup>1</sup>Department of Macromolecular Physics, Faculty of Physics, Adam Mickiewicz University in Poznań,  
10 Umultowska 85, 61-614 Poznań, Poland;

11 <sup>2</sup>current address: Department of Biophysics, Faculty of Physics, University of Warsaw, Pasteura 5, 02-093  
12 Warsaw, Poland; Magdalena.Chrabaszczewska@fuw.edu.pl

13 <sup>3</sup>Faculty of Chemistry, University of Gdańsk, Wita Stwosza 63, 80-308 Gdańsk, Poland

14 <sup>4</sup>Department of Clinical Chemistry, Lund University Hospital, S-22185 Lund, Sweden.

15 <sup>5</sup>Centre for Misfolding Diseases, Department of Chemistry, University of Cambridge, Lensfield Road,  
16 Cambridge, CB2 1EW, UK.

17 <sup>6</sup>current address: Department of Pharmacology, University of Cambridge, Tennis Court Road, Cambridge,  
18 CB2 1PD, UK.

19 \*jrk38@cam.ac.uk

20 \*mkozak@amu.edu.pl

21 <sup>7</sup>C. M. Dobson passed away on 8<sup>th</sup> September, 2019

22

23 Received: date; Accepted: date; Published: date

24 **Abstract:** Human cystatin C (HCC), a cysteine-protease inhibitor, exists as a folded monomer  
25 under physiological conditions but has the ability to self-assemble via domain swapping into  
26 multimeric states, including oligomers with a doughnut-like structure. The structure of the  
27 monomeric HCC has been solved by X-ray crystallography, and a covalently linked version of  
28 HCC (stab-1 HCC) is able to form stable oligomeric species containing 10-12 monomeric subunits.  
29 We have performed molecular modeling, and in conjunction with experimental parameters  
30 obtained from AFM, TEM and SAXS measurements, we observe that the structures are essentially  
31 flat, with a height of about 2 nm, and the distance between the outer edge of the ring and the edge  
32 of the central cavity is ~5.1 nm. These dimensions correspond to the height and diameter of one  
33 stab-1 HCC subunit and we present a dodecamer model for stabilized cystatin C oligomers using  
34 molecular dynamics simulations and experimentally measured parameters. Given that oligomeric  
35 species in protein aggregation reactions are often transient and very highly heterogeneous, the  
36 structural information presented here on these isolated stab-1 HCC oligomers may provide useful  
37 to further explore the physiological relevance of different structural species of cystatin C in  
38 relationship to protein misfolding disease

39

40 **Keywords:** cystatin C, oligomers, domain swapping, protein misfolding

## 41 1. Introduction

42 Human cystatin C (HCC), containing 120 amino acids, belongs to the cystatin type 2  
43 superfamily[1, 2], and is a potent inhibitor of papain-like (C1) and legumain-like (C13)  
44 cysteine-proteases[3, 4]. In humans, HCC was originally identified in cerebrospinal fluid (CSF), but  
45 has subsequently been found in other bodily fluids and tissues[5-7]. The wild-type (WT) form of  
46 HCC is a component of amyloid deposits in, mostly elderly, patients with sporadic cerebral amyloid  
47 angiopathy[8]. Interestingly, the L68Q variant of HCC is associated with a rare hereditary cystatin C  
48 amyloid angiopathy, where the protein forms amyloid deposits in patients suffering from hereditary  
49 cerebral hemorrhage with amyloidosis[8-10]. To date, the crystal structures of monomeric and  
50 dimeric WT HCC have been characterized, the latter in two polymorphic forms[11-13], along with  
51 monomeric and dimeric crystal structures of several HCC mutational variants[14, 15]. Under  
52 physiological conditions WT HCC is a monomer, but when crystallized the protein readily forms  
53 domain-swapped dimers and when subjected to mildly destabilizing solvent conditions, it forms a  
54 number of oligomeric states and fibrils through this domain swapping phenomenon [12, 16]. An  
55 engineered variant of cystatin C (stab-1 HCC), which contains an additional disulfide bridge  
56 (L47C-G69C), stabilizes the monomeric form of the protein and reduces the ability of the protein to  
57 form fibrils[14, 17]. Stable oligomeric species of stab-1 HCC can be formed following incubation of  
58 high concentrations of monomeric protein at pH 7.4 in the presence of 1M guanidinium  
59 hydrochloride and the reducing agent, dithiothreitol[16]. These oligomers can be separated by  
60 size-exclusion chromatography (SEC) and are SDS-resistant but reducing agent sensitive, suggesting  
61 that intermolecular disulfide bonds stabilize the oligomers. By gel electrophoresis analysis, it is  
62 possible to isolate oligomers that have molecular weights which correspond to the size-range for  
63 decamers to dodecamers. These oligomer species do not retain their ability to inhibit papain-like  
64 cysteine proteases which indicates that the N-terminal loops 1 and 2 are not accessible, suggesting  
65 that these oligomers are formed via a domain-swapping mechanism[16].

66 Interestingly, the A11 antibody, designed to bind to soluble oligomers of the A $\beta$  peptide, whose  
67 aggregation is associated with Alzheimer's disease, is able to recognize a number of oligomeric  
68 species composed of different peptides and proteins[18], and has a weak affinity for the  
69 doughnut-like cystatin C oligomers[16]. This observation suggests that structural commonalities  
70 exist within different oligomeric species and therefore, detailed structural analysis of oligomers from  
71 an array of proteins is likely to prove to be insightful for understanding specific mechanisms of  
72 protein misfolding. At present, there are approximately 50 diseases linked to protein misfolding and  
73 amyloid deposition, including neurodegenerative disorders such as Alzheimer's and Parkinson's  
74 diseases, transmissible spongiform encephalopathies (TSEs), and non-neuropathogenic conditions  
75 such as systemic amyloidosis and type II diabetes[19, 20]. Although the primary and tertiary  
76 structures of the functional states of the peptides and proteins involved with these diseases are  
77 diverse, a hallmark of these disorders is the deposition of fibrillar structures which are remarkably  
78 similar[21].

79 The process of fibril formation involves a heterogeneous mixture of different aggregated  
80 species, including the mature fibrils, protofibrils and smaller, oligomeric species[22, 23]. Given that  
81 oligomer species are often transient, heterogeneous in nature and hard to isolate, many methods for  
82 producing stabilized oligomeric species have been employed with different protein substrates.  
83 These methods include the use of chemical crosslinking[24], altering ionic strength and buffer  
84 conditions[25], using lyophilization[26] and through chemical modifications[27]. These well-defined  
85 oligomer species have been used to search for structural attributes that may be important for  
86 pathogenicity, and increasing evidence has suggested that these oligomeric species are likely to be  
87 responsible for cellular toxicity through interactions and disruption of cellular membranes[18,  
88 28-30]. Structural characterization of a range of such oligomer species have shown that they can  
89 adopt a number of morphologies, including spherical beads (2-5 nm in diameter), beaded chains,  
90 curly chains and ring-shaped (doughnut-like) structures[19, 20]. Though less commonly observed  
91 than other types of structures, doughnut-like oligomeric forms have been reported for human

92 cystatin C (HCC)[31] and other amyloidogenic proteins, including  $\alpha$ -synuclein, the amyloid  $\beta$  ( $A\beta$ )  
93 peptide and immunoglobulin light chains[32-34].

94 The aim of this present study is to define a structural model of the stable human cystatin C  
95 oligomers by combining information from the crystal structure of monomeric stab-1 HCC[14], along  
96 with experimental measurements of the oligomers obtained using transmission electron microscopy  
97 (TEM), atomic force microscopy (AFM) and small-angle X-ray scattering (SAXS) techniques, with  
98 molecular dynamics simulations. Using these techniques, we propose a dodecamer model of the  
99 stab-1 cystatin C oligomers.

## 100 2. Results

### 101 2.1. Overall morphology of the stab-1 HCC oligomers

102 TEM and AFM images were used to determine the overall geometric parameters of the stab-1  
103 HCC oligomers that were isolated from size exclusion chromatography and correspond to 10-12  
104 subunits. These samples provided the reference data for the construction of the initial molecular  
105 models of the oligomers. Representative TEM images, illustrating the morphology of the oligomers  
106 are shown in Figure 1. It is clear that a number of small, ring-like aggregates are present within the  
107 sample and that the predominant species appear to be approximately circular, having a diameter of  
108 20-30 nm with a distinctive central cavity, in agreement with previous observations[31]. Some larger  
109 oligomers, of the order of 50 nm in diameter, and also the occasional short fibrillar species (Figure 1)  
110 can be observed, though much less frequently. Analysis of numerous TEM images at higher  
111 resolution (Figure 2) again reveals examples of circular, doughnut-shaped oligomers with differing  
112 sizes, with the smallest about 16-17 nm in diameter ( $d_1$ ) and the largest are about 20-24 nm. For the  
113 oligomers analyzed in detail, the distance between the edge of the central cavity and the inner edge  
114 of the outer ring ( $d_2$ ) is quite similar ( $\sim 5-6$  nm) (Figure 2); this value corresponds very well to the  
115 cross-sectional diameter of one cystatin C molecule in the crystal structure [14].

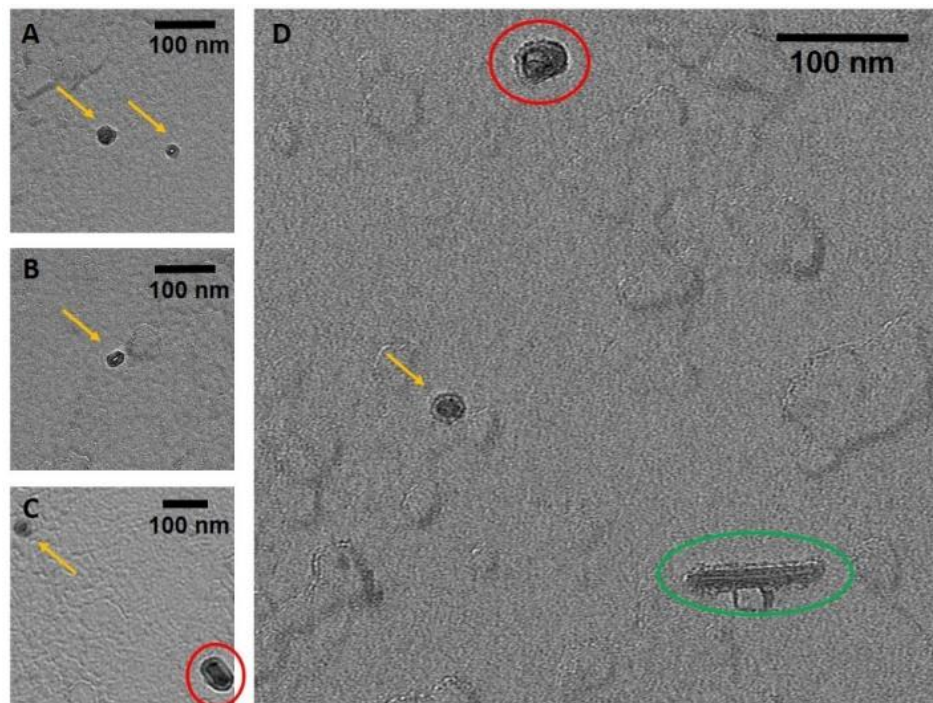

116

117 **Figure 1. TEM images of the stab-1 HCC oligomers.** Selected TEM images of the stab-1 HCC  
118 doughnut-like oligomers stained with uranyl acetate (yellow arrows, panels A-D) showing  
119 representative species present in the samples. Small numbers of short fibrils (green oval, panel D)  
120 and higher molecular weight oligomers (red circles, panels C, D) are also evident. Scale bars are 100  
121 nm in each case.

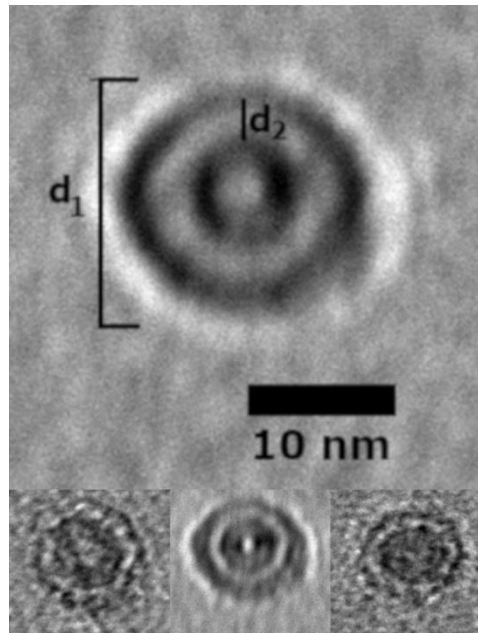

122

123 **Figure 2. Selected stab-1 HCC doughnut-like images of oligomers obtained from TEM data.** Top,  
124 enlargement of the images of stab-1 HCC oligomers observed by TEM. The diameter is indicated by  
125 “ $d_1$ ” and the distance between the inner and outer rings defined as “ $d_2$ ”. Bottom, variations in  $d_1$  and  
126  $d_2$  are likely to be due to the differences in the electron density of the contrasting uranyl acetate  
127 adsorbed to the oligomer surface. Scale bars are 10 nm in each case.

128 To complement the TEM analysis, we used atomic force microscopy (AFM) to provide  
129 independent evidence about the overall morphology of the stab-1 HCC oligomers and also to  
130 determine the heights of the individual oligomers. Representative AFM images are shown in Figure  
131 3, with the predominant species displaying the spherical morphology observed in the majority of the  
132 TEM images. The cross-sectional profiles (Figure 3, right panel), indicate that these circular  
133 oligomers have heights in the range of 1.6 to 2.5 nm and diameters of 20-30 nm which is slightly  
134 larger than what was observed by TEM. However, the AFM measurements were not calibrated to  
135 give accurate XY plane measurements in these experiments, and therefore these diameters may be  
136 over-estimated. The height measurements of the oligomers were therefore taken from the AFM  
137 studies, and the values for the diameters were based on the TEM measurements.



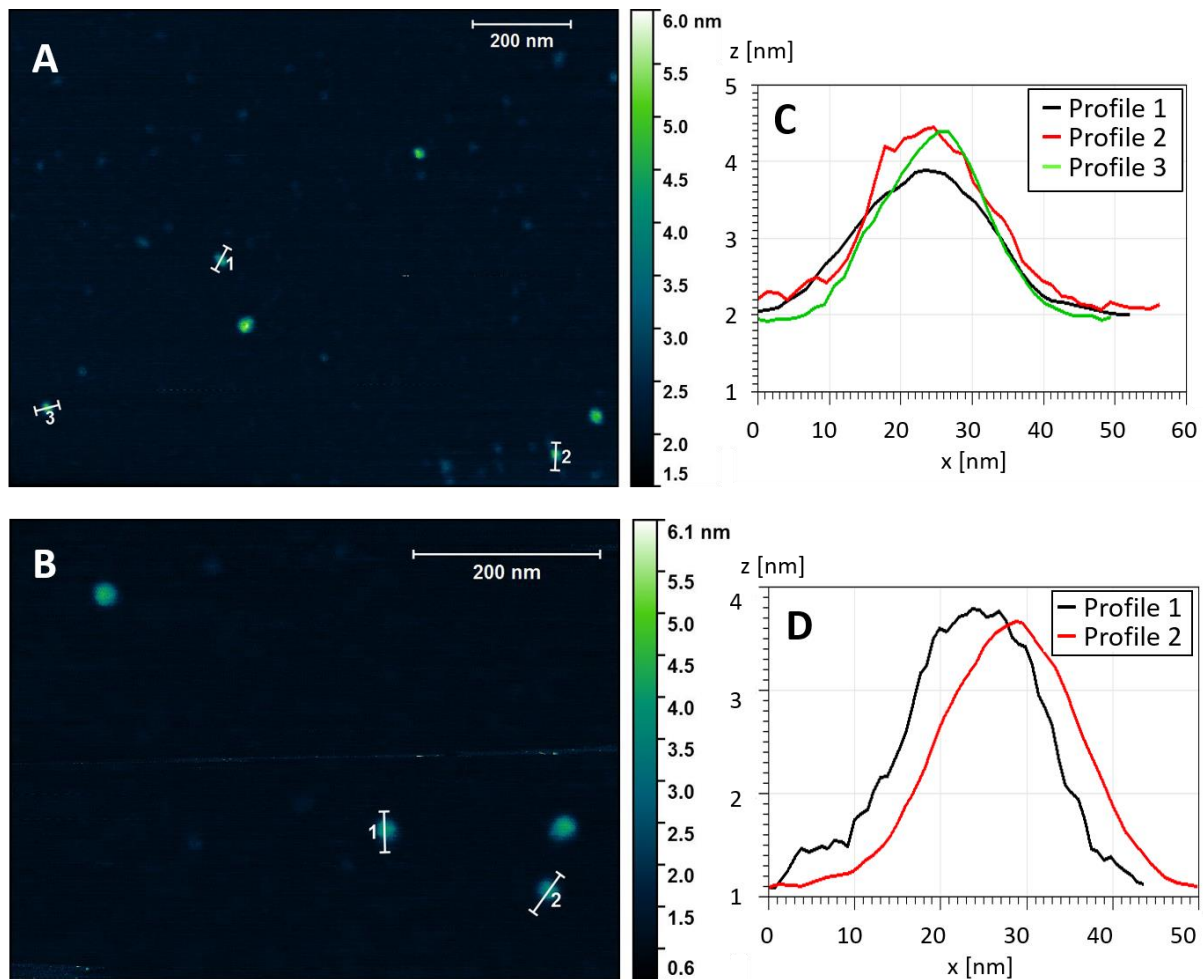

138

139 **Figure 3. Topography of the stab-1 HCC oligomers.** Selected AFM images of the stab-1 HCC  
140 oligomers (A, B) and cross-sectional profiles of the indicated oligomers in the images (C, D). The  
141 height profiles (z [nm]) are presented for the indicated oligomers from panel A (1-3) and panel B  
142 (1-2). From this analysis the diameter (x [nm]) can be approximated.

143 The crystal structure of the stab-1 HCC monomer shows that the protein molecule has a  
144 diameter of approximately 2.5-3.0 nm (excluding the hydration shell on the protein surface) (PDB  
145 code: 3GAX)[14]. Despite the possibility of errors in the heights measured by AFM as a result of  
146 strong adhesion to the mica surface, the value of 2 nm corresponds to a single layer of stab-1 HCC  
147 subunits.

## 148 2.2. Structural parameters of the stab-1 HCC oligomers in solution

149 SAXS studies of the stab-1 HCC oligomers in solution involved the use of synchrotron radiation  
150 which has a risk of causing the reduction of the disulfide bridges that stabilize the overall structure  
151 of the HCC subunits and also the oligomers. We know that human cystatin C and its variants are  
152 sensitive towards synchrotron radiation and prone to aggregation[35]. A detailed inspection of each  
153 of the recorded frames was therefore carried out and only those frames that did not show an  
154 evidence of radiolysis were selected for further analysis. The radius of gyration ( $R_g$ ) for the  
155 oligomers was determined by fitting the SAXS data (Supplementary Figure S1) to the Guinier  
156 equation. The result of the analysis gives a value for  $R_g$  of  $5.28 \pm 0.13$  nm.

157 As a consequence of the limited s-range of the SAXS data due to the low available protein  
158 concentrations and some size polydispersity, a degree of heterogeneity is likely to exist. For these  
159 reasons, we were not able to conduct *ab initio* modeling but instead defined the geometric  
160 parameters of the flattened doughnut-like structure, which best depicts the stab-1 HCC oligomers

161 using the universal  $R_g$  calculator[36]. These calculations indicate that the outer diameter of the  
162 doughnut-like structure is 20-23 nm, the height is 2.4-2.6 nm and the inner diameter is 7-8 nm. These  
163 values are consistent with the height and diameter parameters determined for a single stab-1HCC  
164 subunit of 16-24 nm (outer diameter) and 1.6-2.5 nm (height), obtained from TEM and AFM  
165 measurements. This information was therefore used to define reference parameters for the  
166 construction of the initial models of the stab-1 HCC doughnut-like oligomers, which were required  
167 as input into to molecular dynamics simulations (Table 1).

168 **Table 1.** Summary of structural parameters of the stab-1 HCC oligomers obtained by different  
169 experimental methods.

|      | Outer diameter (nm) | Inner diameter (nm)* | Height (nm) |
|------|---------------------|----------------------|-------------|
| TEM  | 16-24               | 5-6                  | -           |
| AFM  | 20-30               | -                    | 1.6-2.5     |
| SAXS | 20-23               | 7-8                  | 2.4-2.6     |

170 \*The inner diameter is defined as the distance between the outer edge of the internal cavity and the outer edge  
171 of the whole ring structure.

### 172 2.3. Preliminary models of the stab-1 HCC oligomers

173 Two subtypes of stab-1 HCC oligomers, the decamers and dodecamers, were selected for  
174 molecular modeling on the basis of the geometric parameters, derived from TEM, AFM and SAXS  
175 data (Table 1), and also on criteria based on previously published biochemical studies [16]. It has  
176 been shown previously that the stab-1 HCC oligomers are not capable of inhibiting the protease  
177 papain, indicative of the papain-binding site (N-terminal loops 1 and 2) being buried within the  
178 oligomer structure, whereas the oligomers are still capable of inhibiting the activity of legumain,  
179 confirming that this part of the cystatin C structure is still available for protease-binding[16]. As  
180 these earlier studies strongly suggest that the domain-swapped dimeric structure is maintained, this  
181 was incorporated after selection from the initial modeling. For both the decamer and dodecamer  
182 oligomers, a geometric alignment of the HCC subunits using the stab-1 HCC monomeric crystal  
183 structure (PDB: 3GAX) and the SymmDoc platform[37] was performed. From a pool of 100 potential  
184 structures for each oligomer type obtained in this way, the models were grouped manually into five  
185 subfamilies (containing 2-12 models) differing to a small degree in the relative positions of the  
186 subunits.

187 Some of the models selected did not match the geometric parameters defined by the TEM, AFM  
188 and SAXS experimental data and these models were not taken forward into the molecular dynamics  
189 simulations; this eliminated a significant number of potential structures that contained inconsistent  
190 orientations of monomer-like subunits and also barrel-like arrangements that did not match the  
191 experimental dimensions. The models matching the experimental criteria within the decamer and  
192 the dodecamer subgroups were manually compared and four representative models from each of  
193 these sets were selected for future analysis. At this stage, three models of the stab-1 HCC decamers  
194 were selected for further MD simulations as the overall arrangement of subunits was different in  
195 each after the initial docking procedures, interestingly, one of these models was very unstable and  
196 lost its secondary and tertiary structures during the initial steps of the MD simulations; it was  
197 therefore excluded from further studies. A similar approach was taken for the dodecamer models,  
198 where just one dodecamer model was selected, which consisted of a very similar arrangement of  
199 subunits to the selected decamer models. All the initial models of stab-1 HCC decamers and  
200 dodecamers are shown in Supplementary Figure S2.

201 After selection of the starting models obtained from SymmDock, the fragment of the  
202 polypeptide chain (Pro78-Asn79) that is missing in the 3GAX structure was built using  
203 Swiss-PdbViewer v4.1[38], and a domain exchange between neighbouring units in the oligomers  
204 was implemented as shown in Supplementary Figure S3. This exchange was based on the domain  
205 swap mechanism observed in the native HCC crystal structures, in which the N-terminal fragment

206 of the polypeptide chain (residues 1-58) was transferred from the first stab-1 HCC subunit to the  
207 second one, with the rest of the chain remained unaltered[11-13]. With these additions, the models  
208 were used for the molecular dynamics simulation step in AMBER.

#### 209 2.4. Molecular dynamic simulations of the stab-1 HCC oligomers

210 After selecting the preliminary models as described above, we examined the structural and  
211 conformational stabilities of these stab-1 HCC oligomers using molecular dynamics simulations  
212 using the AMBER program package and the AMBER force field. To distinguish between the two  
213 decamer models, we denote them as stab-1 HCC decamer Model 1 and stab-1 HCC decamer Model  
214 2. Molecular dynamics simulations of the stab-1 HCC decamer Model 1 and Model 2 and the  
215 dodecamer model were performed for a total of 50 ns per model. The changes in the potential energy  
216 of these systems as a function of simulation time are shown in Supplementary Figure S4.  
217 Throughout the MD simulations, the dodecamer model has a lower potential energy value  
218 compared to the models of the stab-1 HCC decamers. This is indicative of a greater stability of this  
219 dodecamer oligomer model relative to the decamer models and suggests that it is the most  
220 energetically favoured structure. After ca. 35 ns of MD simulations, the subsequent changes in  
221 energy for all models is relatively small even immediately after the reduction of the positional  
222 constraints imposed on C $\alpha$ , indicating the stabilization of the energy parameters for the decamer  
223 and dodecamer structures.

224 For all the models studied here we also analyzed the changes in root mean squared deviations  
225 (RMSD) during the simulations. The changes in the positions of C $\alpha$  atoms within all the  
226 configurations were compared to the coordinates in the initial model after minimization of the  
227 energies in solution. The changes in RMSD for all three models are shown in Supplementary Figure  
228 S4b. The rapid increase in RMSD values within the first 0.5 ns is likely to result from (i) bringing the  
229 system to the measurement temperature, (ii) the necessity for the protein structure to adapt to the in  
230 silico domain exchange, and (iii) the necessity of the initial structures to adapt after the transfer of  
231 the model, based on the protein structure from the crystallographic data environment, into solution  
232 by applying an *implicit* solvent model.

233 The potential energy and RMSD plots possess a step-like characteristic as a result of the  
234 stepwise reduction of the strength of the restraints imposed on the C $\alpha$  atoms. Over the entire MD  
235 simulations, the change in RMSD values for the decamer Model 1, Model 2 and the dodecamer were  
236 3.84 Å, 4.05 Å and 4.35 Å, respectively. The observed changes in RMSD are related to the presence of  
237 a number of conformational transformations within the native state of the protein in solution[39],  
238 and the larger initial conformational changes are likely to be due to local reorganization resulting  
239 from the domain exchange incorporated in the initial models. In all cases, the trajectory of the RMSD  
240 values stabilized throughout the time course of the MD simulations.

241 To complement these molecular dynamics simulations (time scale 50 ns), we performed  
242 canonical molecular dynamics using a scale-consistent UNitedRESidue (UNRES) course-grained  
243 force field [40-42]. This allowed us to do the simulations on a much longer time-scale (3  $\mu$ s) and we  
244 report the RMSD trajectories along with the TM-scores, which are the scoring function for  
245 automated assessment of protein structure template quality. TM-scores allow evaluation of  
246 structural predictions which has no bias due to the target protein's length or size and which uses all  
247 the residues of the modeled proteins in the evaluation of the score[43]. Simulations performed at  
248 277K and 300K are shown in Figure S5 and Figure S6, and we found that after 3  $\mu$ s at 277K the  
249 TM-scores were 0.52, 0.46 and 0.47 and at 300K, all three models exhibit similar TM-scores of 0.46,  
250 0.43 and 0.43, for the dodecamer, decamer Model 1 and decamer Model 2, respectively. Therefore, as  
251 with our shorter-scale simulations, the most stable model was the dodecamer and we note that out  
252 of the 288 trajectories performed, no dissociation was observed (see comparison of final structures in  
253 Supplementary Figures S7 and S8). We further confirmed, using longer all-atom simulations,  
254 without any restraints, in explicit solvent, that decamer Model 1 and dodecamer are stable  
255 (Supplementary Figure S9). The RMSD for decamer Model 1 rose during the simulation to 7Å while  
256 the RMSD for the dodecamer rose to 16 Å. The lower value for decamer Model 1 revealed a higher



257 stability for this structure as it remained virtually unchanged during the simulations  
258 (Supplementary Figure S10a), whereas the dodecamer shows signs of bending over the time course  
259 (Supplementary Figure S10b). Decamer Model 2 was found to be unstable during the all-atom  
260 simulations. Despite the fact that order of stability order for the decamer Model1 and the dodecamer  
261 differs between the all-atom simulations and the coarse-grained simulations, both methods confirm  
262 that there is no dissociation with either of these two models.

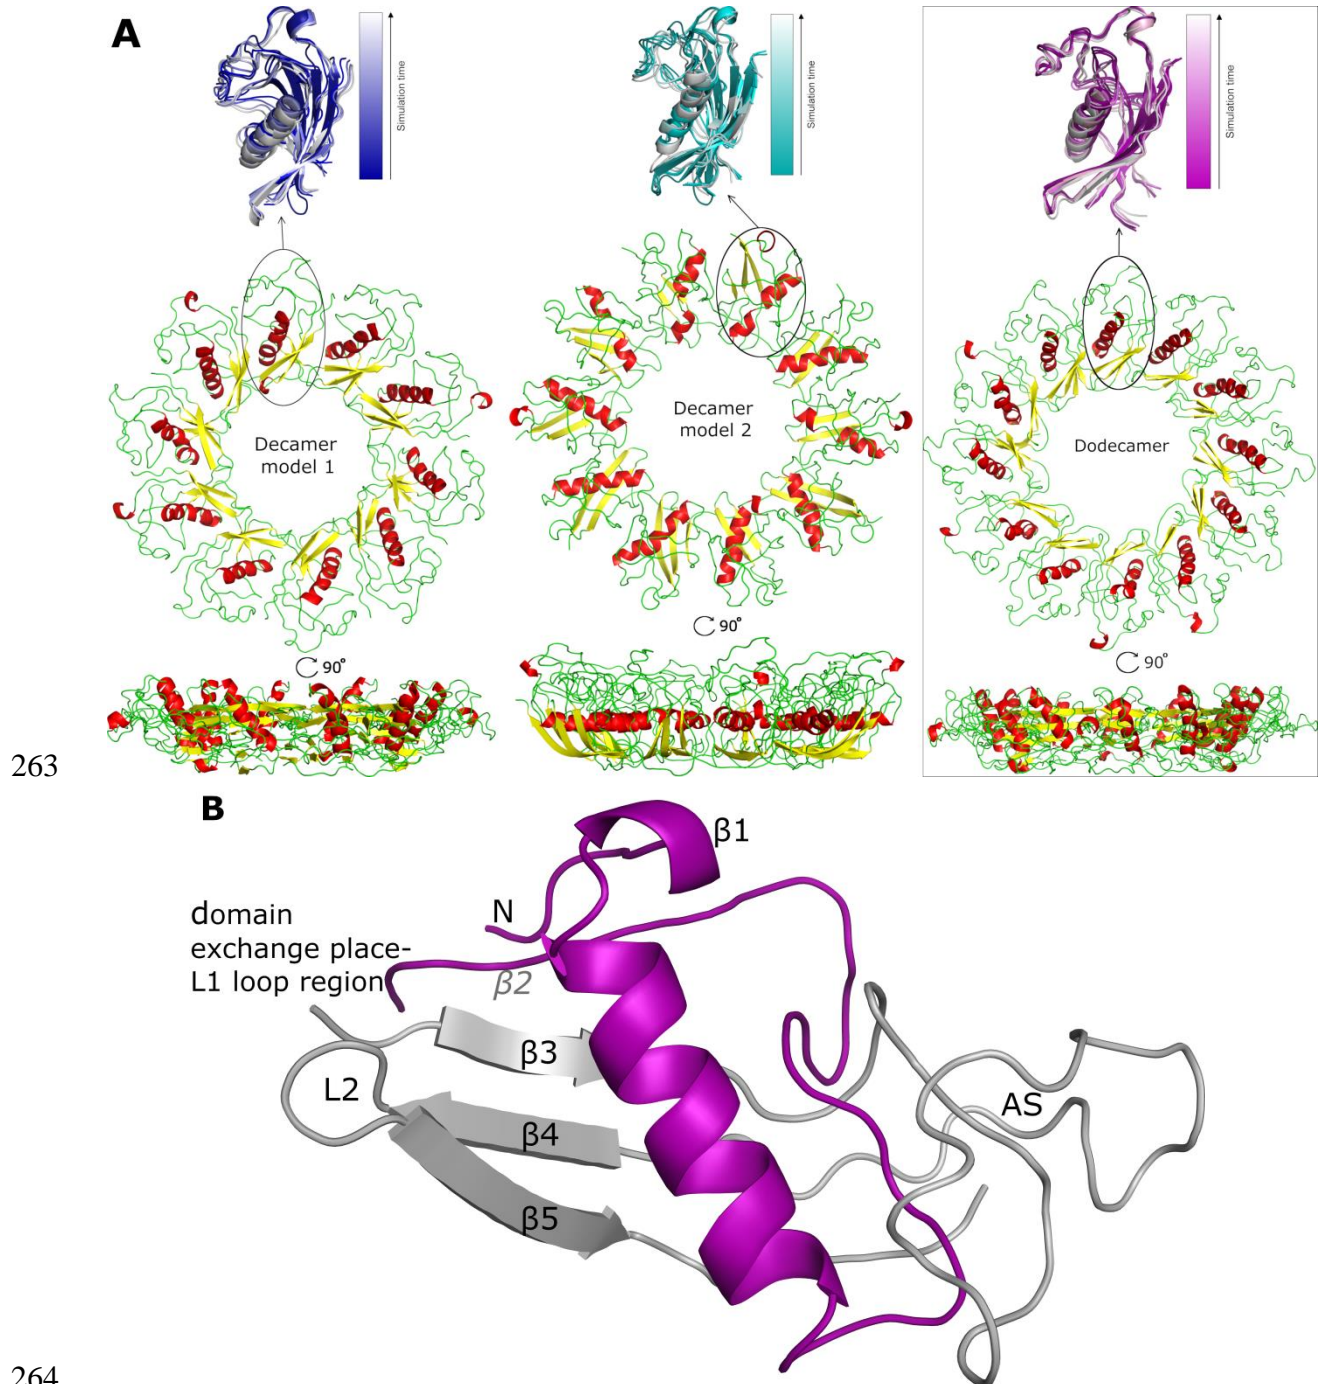

264

265 **Figure 4. Models of the stab-1 HCC oligomers after MD simulations.** A) Final models of HCC:  
266 decamers (left – Model 1, center – Model 2) and dodecamer (right) obtained in the molecular  
267 dynamics simulations. An enlargement of one subunit within the initial models (color) is  
268 superimposed onto the final structures (grey). B) Definition of secondary structure elements  
269 presented in the domain swapping region within the crystallographic model (molecule 1 - light gray,  
270 molecule 2 - purple). The appending structure (AS) is the broad random-coil region between strands  
271  $\beta 3$  and  $\beta 4$  [12].



272 After the simulations, it was clear that the increase in RMSD is largely related to changes in the  
 273 secondary structure within the oligomer models, as the tertiary structure and the overall shape, size  
 274 and position of the stab-1 HCC monomer-like subunits within the oligomers do not change  
 275 significantly (Figure 4a). For all the models of the stab-1 HCC oligomers, a partial loss of secondary  
 276 structure is particularly evident within the  $\beta$ 2 sheet and the L1 loop, which participates in domain  
 277 swapping (Figure 4b). Thus, the structure for the entire subunit changes after domain swapping and  
 278 results in the formation of a loop in place of the  $\beta$  sheet structure of the native state. A comparison of  
 279 the secondary structure content within the final oligomer models to that of the stab-1 HCC monomer  
 280 (PDB code: 3GAX) and the HCC dimer (PDB code: 1G96) is shown in Table 2. The highest degree of  
 281 secondary structure within the polypeptide chain is present in decamer Model 1, with decamer  
 282 Model 2 having the largest disruption to the secondary structure elements relative to the native  
 283 monomer and dimer, containing a random coil fraction of 43%[12, 31].

284 **Table 2.** Secondary structure content of the proposed stab-1 HCC oligomer structures calculated  
 285 using the STRIDE web server[44] and compared with values derived from the crystal structure of the  
 286 stab-1 HCC monomer (PDB code: 3GAX;[14]) and the HCC dimer (PDB code: 1G96;[12]).

| Secondary structure element | 3GAX (monomer) | 1G96 (dimer) | Dodecamer | Decamer Model 1 | Decamer Model 2 |
|-----------------------------|----------------|--------------|-----------|-----------------|-----------------|
| $\alpha$ -helices           | 17%            | 18%          | 17.8%     | 16.9%           | 15.1%           |
| $\beta$ -sheets             | 45%            | 36%          | 21.3%     | 25.3%           | 22.2%           |
| Turns                       | 11%            | 19%          | 26.6%     | 28%             | 19.7%           |
| Coil                        | 27%            | 27%          | 34.3%     | 29.9%           | 43%             |

287 Analysis of the structures of the individual oligomer models show that the greatest structural  
 288 changes occur within decamer Model 2 (see Table 2 and 3). In comparison to the initial model used  
 289 for the MD simulations, the outer edge of this model has shifted to the interior of the oligomer  
 290 structure, creating a bowl shape. The height of this oligomer also increases to 3.5 nm, a value that is  
 291 higher than estimated from AFM measurements (1.6-2.4 nm). In contrast, the diameter of decamer  
 292 Model 2 is 0.5 nm smaller than that observed for the decamer Model 1. Overall, the HCC dodecamer  
 293 is the most energetically stable structure in the MD simulations and the dimensions of the proposed  
 294 model are in closest agreement with the structural parameters of the circular oligomers obtained  
 295 from experimental studies (TEM, AFM and SAXS) (Table 3).  
 296

297 **Table 3.** Structural parameters of models of the stab-1 HCC oligomers after MD simulations.

|                            | Decamer Model 1 | Decamer Model 2 | Dodecamer |
|----------------------------|-----------------|-----------------|-----------|
| <b>Outer Diameter [nm]</b> | 12.0            | 11.5            | 13.8      |
| <b>Inner Diameter*[nm]</b> | 4.8             | 5.1             | 4.8       |
| <b>Height [nm]</b>         | 2.3             | 3.5             | 2.5       |

298 \*Inner diameter is defined as the distance between the internal cavity and the outer ring structure

299 The conformational stability of the oligomers and their secondary structure depends on the  
 300 presence of arrays of hydrogen bond networks that not only stabilize the structure of the particular  
 301 subunits, but which are also observed to form between different subunits via domain swapping; a  
 302 key factor for the stability of the entire oligomeric structure. For the dodecamer model, stable  
 303 hydrogen bonds between two domains within the same subunit are formed between Asp65-Arg51  
 304 ( $O^{D2}-H^{H22}-N^{H2}$ ), and are present for 78.4% of the MD simulation time; domain swapped hydrogen  
 305 bonds are, however, formed between two pairs of residues: Glu21-Arg51 ( $O^{E1}-H^{H11}-N^{H1}$ ) and  
 306 Pro105-Asn61 ( $O-H^{D22}-N^{D2}$ ) and are present for 84% and 72% of the MD simulations, respectively  
 307

308 (Figure 5). The presence of domain swapped hydrogen bonds is indicative of the high stability of the  
309 dodecamer model.  
310

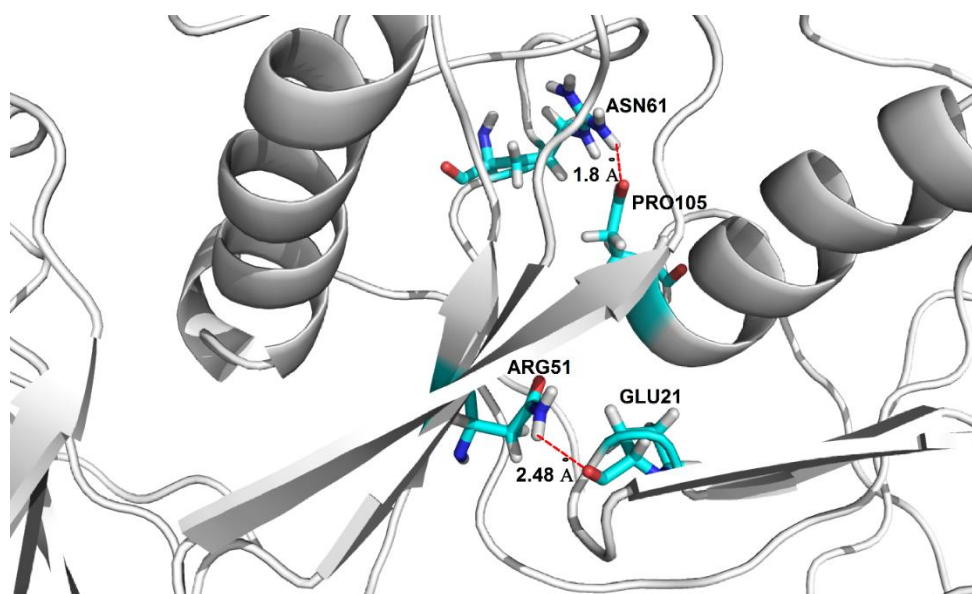

311

312 **Figure 5.** Location of domain swapping hydrogen bonds stabilizing the stab-1 HCC dodecamer  
313 oligomers. Domain swapping hydrogen bonds observed between Glu21-Arg51 and Pro105-Asn61.

314

### 315 3. Discussion

316 As a result of the good correlation between the MD simulations and the experimental  
317 parameters measured by AFM, TEM and SAXS, we propose a model of the stab-1 HCC oligomers in  
318 solution as a doughnut-like dodecamer structure. This dodecamer structure is the most energetically  
319 favoured of the three models we have examined. Although a small population of larger, cyclic  
320 species, as well as short fibrils, have been observed sporadically in TEM images, the majority of the  
321 species we have observed experimentally fit well with this proposed dodecamer model.

322 It is interesting to note that these stabilized HCC oligomers, which do not readily form fibrillar  
323 species, maintain a significant degree of native-like structure. Such maintenance of native-like  
324 structure has also been reported for WT HCC oligomeric species formed under non-denaturing  
325 conditions[45]. These reported oligomers retain native secondary structure and both papain and  
326 legumain enzymatic inhibitory function and appear to be non-domain swapped species, but unlike  
327 our stabilized oligomers, the average size of those species is that of a trimer[45]. Interestingly,  
328 stabilized oligomers from another member of the cystatin superfamily, stefin B (or cystatin B), have  
329 been observed and characterised as domain-swapped tetrameric oligomers which are stabilized by a  
330 “hand-shake mechanism”[46]. As such, Pro74 is in the *cis* form (opposed to the *trans* form normally  
331 adopted in the monomer) and this causes domain-swapped dimers to become intertwined. Like the  
332 stab-1 HCC oligomers, the reported trimeric non-domain swapped oligomers as well as the stefin B  
333 oligomers do not readily proceed to fibril formation of cystatin C[16, 41, 45, 46].

334 The stab-1 HCC aggregates analyzed in this study can be isolated and are relatively stable in  
335 solution, and this has enabled the detailed study of their structural nature. Using experimental  
336 measurements and MD simulations, we propose a dodecamer structural model of the stab-1 HCC  
337 doughnut-like oligomers. Given the generic property of proteins to form amyloid fibrils, mounting  
338 evidence that the formation of oligomers is also a commonality amongst diverse substrates is  
339 increasing and interestingly, along with oligomers isolated from intrinsically disordered proteins,  
340 such as A $\beta$  peptides and  $\alpha$ -synuclein, a number of structural studies have been reported for  
341 oligomers formed by proteins which have globular native structures, such as hen egg-white  
342 lysozyme, transthyretin, HypFN, acylphosphatase and cystatin C[47-50]. With the growing  
343 importance of understanding the biological significance of oligomeric species, the structural  
344 information presented here on the stab-1 HCC oligomers provides further information on the nature  
345 of such species.

346

### 347 4. Materials and Methods

#### 348 4.1. Production of stabilized oligomers

349 Covalently stabilized oligomers of human cystatin C (stab-1 HCC) were produced and purified  
350 as described previously [16] and the samples for transmission electron microscopy and atomic force  
351 microscopy measurements were isolated by size-exclusion gel chromatography as previously  
352 detailed, and kept in sodium bicarbonate buffer (50 mM, pH 7.8, 4°C) prior to imaging.

#### 353 4.2. Transmission electron microscopy

354 Stab-1 HCC oligomer solutions (3-5  $\mu$ L) for characterization by TEM were applied to  
355 carbon-coated 400 mesh nickel grids (TAAB Laboratory Equipment Ltd., Aldermaston, UK),  
356 allowed to adsorb for 60 s and then blotted using filter paper. Samples were stained with 2% (w/v)  
357 uranyl acetate for 30 s, and washed with deionized water. The samples were imaged on a FEI Tecnai  
358 G2 transmission electron microscope at the Cambridge Advanced Imaging Centre (CAIC),  
359 University of Cambridge, UK. Images were recorded using the SIS Megaview II Image Capture  
360 System (Olympus, Tokyo, Japan). Analysis of the resulting TEM images was performed using  
361 ImageJ [51].

### 362 4.3. Atomic force microscopy

363 Topographic images of the oligomers were collected using a NanoWizard AFM system (JPK  
364 Instruments AG, Berlin, Germany). Purified samples were first diluted in deionized water by a  
365 factor of 1000-5000, to give concentrations of ~2-10 pM. These solutions (5-10 µl) were placed on  
366 freshly prepared mica surfaces, adsorbed for 10-20 min, gently washed with small amounts of  
367 deionized water and dried using nitrogen gas. AFM imaging was performed in the intermittent (air)  
368 contact mode using a silicon nitride cantilever. The analysis of the images was carried out using  
369 Gwyddion 2.45 software [52].

### 370 4.4. Small angle X-ray scattering

371 The small angle X-ray scattering (SAXS) data for solutions of stab-1 HCC oligomers (1.1  
372 mg/mL) were collected on the BioSAXS X33 bending magnet beamline, operated by EMBL [53, 54] at  
373 the DORIS III storage ring of DESY (Hamburg, Germany). The experiments were conducted in a  
374 standard manner using an autosampler, a hybrid photon counting detector (Pilatus 1M-W, Dectris,  
375 Baden-Daettwil, Switzerland) and synchrotron radiation ( $\lambda = 0.15$  nm). The data were processed  
376 using PRIMUS [55] from the ATSAS package [56], and the radius of gyration ( $R_g$ ) was calculated by  
377 fitting of the SAXS data in the  $s$ -range from 0.124 to 0.247 nm<sup>-1</sup> ( $sR_g < 1.3$ ,  $s = 4\lambda \sin \theta / \lambda$ , where  $\theta$  is a  
378 scattering angle) to the Guinier equation (Eq. 1)

$$I(s) = I(0)e^{-(sR_g)^2/3} \quad (1)$$

379 The universal  $R_g$  calculator [41], was used to define the geometric parameters of the images that best  
380 depicted the shape of doughnut-like oligomers.

### 381 4.5. Molecular dynamics simulations

#### 382 4.5.1. Preparation of initial models

383 Preliminary models of stab-1 HCC decamers and dodecamers were constructed using the  
384 crystal structure of the stab-1 HCC monomer (PDB: 3GAX) [14]. The subunits (HCC monomers)  
385 were assembled into oligomers using the docking server SymmDock[37]. For the construction of the  
386 initial atomic models of the oligomers, two types of oligomers containing 10 and 12 monomer-like  
387 subunits were defined on the basis of previous gel filtration analysis [16], and the structures of the  
388 oligomers were obtained by the geometrical matching of the given subunits in space. The  
389 parameters (oligomer diameter, height and inner cavity diameter) determined from the TEM and  
390 AFM measurements were used as the initial geometric parameters. These dimensions suggest that  
391 the rings are composed of individual monomer-like subunits arranged in a circular shape. From the  
392 final set of 100 structures for each oligomer type produced using SymmDock, only those models  
393 satisfying the experimental geometrical and structural conditions were considered further. Once  
394 these models were selected, a fragment of the polypeptide chain (Pro78-Asn79) for which electron  
395 density is missing in the X-ray structure (3GAX) was built using Swiss-pdb Viewer 4.1, and the  
396 exchange of the subdomains, up to position Ala58, was implemented manually according to the  
397 domain swapping mechanism observed in the native HCC crystal structure [11-13]. The domain  
398 swapping is implemented intermolecularly throughout the oligomer therefore, we manually broke  
399 the bond between residue 58 and 59 to allow the transfer of residues 1-58 from one subunit to the  
400 next. Due to this broken bonds in these initial models, larger positional restraints were imparted at  
401 the beginning of the MD simulations. The atomic positions of the residues in the N-terminal segment  
402 of the polypeptide chain (residues 1-58) were transferred from the first stab-1 HCC monomer-like  
403 subunit to the second one, with the rest of the first chain remaining unaltered. This phase of the  
404 modeling was conducted in JOE (operating in the Linux environment). Analogous procedures were  
405 performed for all subunits in the selected models of the stab-1 HCC decamers and dodecamers prior  
406 to the molecular dynamics simulations in AMBER.



#### 407 4.5.2. Simulations using AMBER

408 Molecular dynamics simulations of the doughnut-like oligomers (decamers and dodecamers)  
409 were carried out using the PMEMD module of the program SANDER from the AMBER 12 package  
410 [57, 58], employing the graphics processing units (GPUs) [58]. Preliminary minimizations of the  
411 initial oligomeric structures were performed in two steps, the first involving minimization *in vacuo*  
412 and the second in *implicit* solvent. Each minimization cycle was completed within 10,000 steps,  
413 where each step was 2 fs in duration, and both the minimization steps and the molecular dynamics  
414 simulations were conducted in the presence of restraints. As the domain swapping process was  
415 carried out manually, no bonds were imposed at position 58 (in any subunit), nor for the two amino  
416 acids on either side of this residue (i.e. Ile56 and Val57, Gly59 and Val60), thereby permitting slow  
417 relaxation of the structure in the area closest to the domain exchange region that is located in the L1  
418 loop (i.e. within the Ile56-Val60 segment). During the molecular dynamics simulations, the strength  
419 of these positional restraints was gradually reduced from an initial value of 20 kcal/mol to a final  
420 value of 0.3 kcal/mol.

421 During the second cycle of minimization, the MD simulations of the stab-1 HCC oligomers  
422 were carried out in *implicit* solvent (considering it to be an infinite medium, with specific properties  
423 related to water, such as the dielectric constant). The solvation model was described by the Born  
424 model as generalized in the Hawkins, Cramer, Truhlar approach [59, 60], using the parameters  
425 provided by Tsui& Case [61]. The lengths of the hydrogen bonds were maintained at constant values  
426 using the SHAKE algorithm, and for all of the oligomers the temperature was kept at 300K and was  
427 regulated by the Berendsen algorithm [62].

428 The total time for the simulation of each oligomer was 50 ns (i.e. 25 million steps), but the  
429 simulation procedure was split into several cycles. After each cycle, a model of the stab-1 HCC  
430 oligomer was generated and the positional restraints imposed on the C $\alpha$  atoms were gradually  
431 reduced from 20 to 0.5 kcal/mol in the time range 0-35 ns, and to 0.3 kcal/mol in the time range of  
432 35-50 ns. The MD simulations were continued until the energy of the system reached equilibrium.

433 The analysis of the oligomer models obtained during MD simulations involved (i) analysis of  
434 the trajectory (RMSD) performed using *ptraj* from the AMBER package, (ii) analysis of the hydrogen  
435 bonds using *cpptraj* from the AMBER package, (iii) analysis of the secondary structure using the  
436 STRIDE web server [44], and (iv) analysis of the potential energy and temperature using the  
437 process\_mdout.perl script (AMBER) to extract the information from the MD output files. Visual  
438 representations of the structures of the oligomers were generated using PyMOL (*The PyMOL*  
439 *Molecular Graphics System, Version 1.5.0.4 Schrödinger, LLC*).

#### 440 4.5.3. Canonical molecular dynamics with use of scale-consistent UNitedRESidue (UNRES) 441 coarse-grained force field

442 To determine the stability of the obtained models we performed canonical molecular dynamics  
443 using scale-consistent United RESidue (UNRES) coarse-grained force field as described previously  
444 [42]. We performed simulations at two temperatures: 277K (experimental temperature) and 300K  
445 (room temperature) with 48 trajectories for each system and each temperature. For both  
446 temperatures, we performed 6 million step simulations with 0.498 fs time steps that correspond to 3  
447 ns of UNRES time which, after compensating for the speed due to coarse-graining, corresponds to ~  
448 3  $\mu$ s of real-time [63, 64]. Langevin thermostat was used and the friction factor was scaled down by  
449 100 to speed up the simulations. To prevent eventual reassociation of the dissociated multimers, the  
450 box size was set to 800 Å X 800 Å X 800 Å. Root-mean-square deviation (RMSD) measurements and  
451 TM-scores [43] were used to estimate the stability of the models.

#### 452 4.5.4. All-atom simulation with AMBER ff14SB force field

453 The all-atom simulations were performed with the AMBER ff14SB force field. The model  
454 protein was placed in a cuboid box in TIP3P explicit water. The size of the box was the size of the  
455 protein with an additional 10Å from each side for decamer Model 1 and 20 Å from each side for

456 decamer Model 2 and the Dodecamer model, as the latter have larger sizes. The energy was  
457 minimized with a protocol that consisted of (i) restrained energy minimization with  $\text{Ca}$ -distance  
458 restraints derived from the appropriate model and on the backbone dihedral angles from the regions  
459 of regular  $\alpha$ -helical and  $\beta$ -sheet structure followed by (ii) a short restrained MD simulation with the  
460 same restraints. Subsequently, the short NPT simulation was performed and afterwards a 100 ns  
461 NVT production run was performed.

462 **Supplementary Materials:** Supplementary materials can be found at [www.mdpi.com/xxx/s1](http://www.mdpi.com/xxx/s1) and consist on ten  
463 figures: Figure S1. SAXS data recorded for the stab-1 HCC oligomers in solution; Figure S2. Modeling of the  
464 stab-1 HCC oligomers; Figure S3. The domain swapping scheme in the stab-1 HCC oligomers; Figure S4.  
465 Molecular dynamics simulations of the stab-1 HCC oligomers; Figure S5. UNitedRESidue (UNRES)  
466 coarse-grain simulations of the stab-1 HCC oligomers at 277K; Figure S6. UNitedRESidue (UNRES)  
467 coarse-grain simulations of the stab-1 HCC oligomers at 300K; Figure S7. UNitedRESidue (UNRES)  
468 coarse-grain simulation models of the stab-1 HCC oligomers at 277K; Figure S8. UNitedRESidue (UNRES)  
469 coarse-grain simulation models of the stab-1 HCC oligomers at 300K; Figure S9. RMSD as a function of time;  
470 Figure S10. Structure after 100ns coarse-grain simulation of Model 1 of decamer.

471 **Author Contributions:** Conceptualization and methodology, M.C., J.R.K., M.K.; Investigation, M.C., A.K.S.,  
472 S.R.-M., J.R.K., M.K.; Formal Analysis, M.C., A.K.S., S.R.-M., A.G., C.M.D., J.R.K., M.K.; Visualization, M.C.,  
473 A.K.S. and M.K.; Writing - original draft, review & editing, M.C., A.K.S., S.R.-M., A.G., C.M.D., J.R.K., M.K. All  
474 authors have read and agreed to the published version of the manuscript.

475 **Funding:** This research project has been financed by the funds from the National Science Centre (Poland)  
476 granted on the basis of decision no. DEC-2012/06/M/ST4/00036. MK would also like to acknowledge the partial  
477 support of the bilateral research and development grant: POLTUR2/3/2017 (NCBR) & 117Z009 (TŰBĪTAK). JRK  
478 and CMD would also like to acknowledge the Wellcome Trust (094425/Z/10/Z) and the Centre for Misfolding  
479 Diseases

480 **Conflicts of Interest:** The authors declare no conflict of interest

## 481 References

- 482 1. Barrett, A.J.; Fritz, H.; Grubb, A.; Isemura, S.; Jarvinen, M.; Katunuma, N.; Machleidt, W.; Mulleresterl, W.;  
483 Sasaki, M. & Turk, V., Nomenclature and classification of the proteins homologous with the  
484 cysteine-proteinase inhibitor chicken cystatin. *Biochem. J.* (1986). 236, 312-312.
- 485 2. Grubb, A. & Lofberg, H., Human gamma-trace, a basic microprotein - amino-acid-sequence and presence  
486 in the adenohipophysis. *Proc. Natl. Acad. Sci. USA.* (1982). 79, 3024-3027.
- 487 3. Abrahamson, M., Cystatins. *Methods Enzymol.* (1994). 244, 685-700.
- 488 4. Alvarez-Fernandez, M.; Barrett, A.J.; Gerhartz, B.; Dando, P.M.; Ni, J. & Abrahamson, M., Inhibition of  
489 mammalian legumain by some cystatins is due to a novel second reactive site. *J Biol Chem.* (1999). 274,  
490 19195-203.
- 491 5. Bobek, L.A. & Levine, M.J., Cystatins - Inhibitors of cysteine proteinases. *Crit. Rev. Oral. Biol. Med.* (1992). 3,  
492 307-332.
- 493 6. Mathews, P.M. & Levy, E., Cystatin C in aging and in Alzheimer's disease. *Ageing Res. Rev.* (2016). 32, 38-50.
- 494 7. Turk, V.; Stoka, V. & Turk, D., Cystatins: Biochemical and structural properties, and medical  
495 relevance. *Front. Biosci.* (2008). 13, 5406-5420.
- 496 8. Levy, E.; Jaskolski, M. & Grubb, A., The role of cystatin C in cerebral amyloid angiopathy and stroke: Cell  
497 biology and animal models. *Brain Pathol.* (2006). 16, 60-70.
- 498 9. Abrahamson, M.; Jonsdottir, S.; Olafsson, I.; Jensson, O. & Grubb, A., Hereditary cystatin-C amyloid  
499 angiopathy - Identification of the disease-causing mutation and specific diagnosis by polymerase  
500 chain-reaction based analysis. *Hum. Genet.* (1992). 89, 377-380.
- 501 10. Jurczak, P.; Groves, P.; Szymanska, A. & Rodziewicz-Motowidlo, S., Human cystatin C monomer, dimer,  
502 oligomer, and amyloid structures are related to health and disease. *FEBS Lett.* (2016). 590, 4192-4201.
- 503 11. Janowski, R.; Kozak, M.; Abrahamson, M.; Grubb, A. & Jaskolski, M., 3d domain-swapped human cystatin  
504 C with amyloidlike intermolecular beta-sheets. *Proteins.* (2005). 61, 570-578.
- 505 12. Janowski, R.; Kozak, M.; Jankowska, E.; Grzonka, Z.; Grubb, A.; Abrahamson, M. & Jaskolski, M., Human  
506 cystatin C, an amyloidogenic protein, dimerizes through three-dimensional domain swapping. *Nat. Struct.*  
507 *Biol.* (2001). 8, 316-320.

- 508 13. Kozak, M.; Jankowska, E.; Janowski, R.; Grzonka, Z.; Grubb, A.; Fernandez, M.A.; Abrahamson, M.  
509 & Jaskolski, M., Expression of a selenomethionyl derivative and preliminary crystallographic studies of  
510 human cystatin C. *Acta Crystallogr. D Biol. Crystallogr.* (1999). 55, 1939-1942.
- 511 14. Kolodziejczyk, R.; Michalska, K.; Hernandez-Santoyo, A.; Wahlbom, M.; Grubb, A. & Jaskolski, M., Crystal  
512 structure of human cystatin C stabilized against amyloid formation. *FEBS J.* (2010). 277, 1726-1737.
- 513 15. Orlikowska, M.; Jankowska, E.; Kolodziejczyk, R.; Jaskolski, M. & Szymanska, A., Hinge-loop mutation can  
514 be used to control 3D domain swapping and amyloidogenesis of human cystatin C. *J. Struct. Biol.* (2011).  
515 173, 406-413.
- 516 16. Östner, G.; Lindstrom, V.; Christensen, P.H.; Kozak, M.; Abrahamson, M. & Grubb, A., Stabilization,  
517 characterization, and selective removal of cystatin C amyloid oligomers. *J. Biol. Chem.* (2013). 288,  
518 16438-16450.
- 519 17. Nilsson, M.; Wang, X.; Rodziewicz-Motowidlo, S.; Janowski, R.; Lindstrom, V.; Onnerfjord, P.;  
520 Westermark, G.; Grzonka, Z.; Jaskolski, M. & Grubb, A., Prevention of domain swapping inhibits  
521 dimerization and amyloid fibril formation of cystatin C - use of engineered disulfide bridges, antibodies,  
522 and carboxymethylpapain to stabilize the monomeric form of cystatin C. *J. Biol. Chem.* (2004). 279,  
523 24236-24245.
- 524 18. Kaye, R.; Head, E.; Thompson, J.L.; McIntire, T.M.; Milton, S.C.; Cotman, C.W. & Glabe, C.G., Common  
525 structure of soluble amyloid oligomers implies common mechanism of pathogenesis. *Science.* (2003). 300,  
526 486-489.
- 527 19. Chiti, F. & Dobson, C.M., Protein misfolding, functional amyloid, and human disease. *Ann. Rev.*  
528 *Biochem.* (2006). 75, 333-366.
- 529 20. Chiti, F. & Dobson, C.M., Protein misfolding, amyloid formation, and human disease: A summary of  
530 progress over the last decade. *Ann. Rev. Biochem.* (2017). 86, 27-68.
- 531 21. Sunde, M.; Serpell, L.C.; Bartlam, M.; Fraser, P.E.; Pepys, M.B. & Blake, C.C., Common core structure of  
532 amyloid fibrils by synchrotron x-ray diffraction. *J Mol Biol.* (1997). 273, 729-39.
- 533 22. Cohen, S.I.; Vendruscolo, M.; Dobson, C.M. & Knowles, T.P., From macroscopic measurements to  
534 microscopic mechanisms of protein aggregation. *J Mol Biol.* (2012). 421, 160-71.
- 535 23. Knowles, T.P.J.; Vendruscolo, M. & Dobson, C.M., The amyloid state and its association with protein  
536 misfolding diseases *Nat. Rev. Mol. Cell Biol.* (2014). 15, 496-496.
- 537 24. Hayden, E.Y.; Conovaloff, J.L.; Mason, A.; Bitan, G. & Teplow, D.B., Preparation of pure populations of  
538 covalently stabilized amyloid beta-protein oligomers of specific sizes. *Anal. Biochem.* (2017). 518, 78-85.
- 539 25. Stine, W.B.; Jungbauer, L.; Yu, C. & LaDu, M.J., Preparing synthetic ab in different aggregation  
540 states. *Methods Mol. Biol.* (2011). 670, 13-32.
- 541 26. Chen, S.W.; Drakulic, S.; Deas, E.; Ouberai, M.; Aprile, F.A.; Arranz, R.; Ness, S.; Roodveldt, C.; Williams,  
542 T.; De-Genst, E.J.; Klenerman, D.; Wood, N.W.; Knowles, T.P.J.; Alfonso, C.; Rivas, G.; Abramov, A.Y.;  
543 Valpuesta, J.M.; Dobson, C.M. & Cremades, N., Structural characterization of toxic oligomers that are  
544 kinetically trapped during alpha-synuclein fibril formation. *Proc. Natl. Acad. Sci. USA.* (2015). 112,  
545 E1994-E2003.
- 546 27. Cremades, N.; Chen, S.W. & Dobson, C.M., Structural characteristics of alpha-synuclein oligomers. *Int. Rev.*  
547 *Cell Mol. Biol.* (2017). 329, 79-143.
- 548 28. Bucciantini, M.; Giannoni, E.; Chiti, F.; Baroni, F.; Formigli, L.; Zurdo, J.S.; Taddei, N.; Ramponi, G.;  
549 Dobson, C.M. & Stefani, M., Inherent toxicity of aggregates implies a common mechanism for protein  
550 misfolding diseases. *Nature.* (2002). 416, 507-511.
- 551 29. Fusco, G.; Chen, S.W.; Williamson, P.T.F.; Cascella, R.; Perni, M.; Jarvis, J.A.; Cecchi, C.; Vendruscolo, M.;  
552 Chiti, F.; Cremades, N.; Ying, L.; Dobson, C.M. & De Simone, A., Structural basis of membrane disruption  
553 and cellular toxicity by alpha-synuclein oligomers. *Science.* (2017). 358, 1440-1443.
- 554 30. Kaye, R. & Lasagna-Reeves, C.A., Molecular mechanisms of amyloid oligomers toxicity. *J. Alzheimers*  
555 *Dis.* (2013). 33, S67-S78.
- 556 31. Wahlbom, M.; Wang, X.; Lindstrom, V.; Carlemalm, E.; Jaskolski, M. & Grubb, A., Fibrillogenic oligomers  
557 of human cystatin c are formed by propagated domain swapping. *J. Biol. Chem.* (2007). 282, 18318-18326.
- 558 32. Kawahara, M. & Kuroda, Y., Molecular mechanism of neurodegeneration induced by alzheimer's  
559 beta-amyloid protein: Channel formation and disruption of calcium homeostasis. *Brain Res. Bull.* (2000). 53,  
560 389-397.

- 561 33. Lashuel, H.A.; Petre, B.M.; Wall, J.; Simon, M.; Nowak, R.J.; Walz, T. & Lansbury, P.T., Alpha-synuclein,  
562 especially the Parkinson's disease-associated mutants, forms pore-like annular and tubular protofibrils.*J.*  
563 *Mol. Biol.* (2002). 322, 1089-1102.
- 564 34. Zhu, M.; Han, S.B.; Zhou, F.M.; Carter, S.A. & Fink, A.L., Annular oligomeric amyloid intermediates  
565 observed by in situ atomic force microscopy.*J. Biol. Chem.* (2004). 279, 24452-24459.
- 566 35. Taube, M.; Pietralik, Z.; Szymanska, A.; Szutkowski, K.; Clemens, D.; Grubb, A. & Kozak, M., The domain  
567 swapping of human cystatin C induced by synchrotron radiation.*Sci Rep.* (2019). 9, 8548.
- 568 36. Kriechbaum, M. *Universal Rg calculator.* 2017; Available from:  
569 <https://www.staff.tugraz.at/manfred.kriechbaum/xitami/java/rgpoly.html>.
- 570 37. Schneidman-Duhovny, D.; Inbar, Y.; Nussinov, R. & Wolfson, H.J., Patchdock and symmdock: Servers for  
571 rigid and symmetric docking.*Nucleic Acids Res.* (2005). 33, W363-W367.
- 572 38. Guex, N. & Peitsch, M.C., Swiss-model and the swiss-PDBviewer: An environment for comparative protein  
573 modeling.*Electrophoresis.* (1997). 18, 2714-2723.
- 574 39. Onuchic, J.N.; LutheySchulten, Z. & Wolynes, P.G., Theory of protein folding: The energy landscape  
575 perspective.*Ann. Rev. Phys. Chem.* (1997). 48, 545-600.
- 576 40. Czaplowski, C.; Karczynska, A.; Sieradzan, A.K. & Liwo, A., UNRES server for physics-based  
577 coarse-grained simulations and prediction of protein structure, dynamics and thermodynamics.*Nucleic*  
578 *Acids Res.* (2018). 46, W304-W309.
- 579 41. Hasanbasic, S.; Taler-Vercic, A.; Puizdar, V.; Stoka, V.; Znidaric, M.T.; Vilfan, A.; Berbic, S. & Zerovnik, E.,  
580 Prolines affect the nucleation phase of amyloid fibrillation reaction; mutational analysis of human stefin  
581 b.*ACS Chem. Neurosci.* (2019). 10, 2730-2740.
- 582 42. Sieradzan, A.K.; Makowski, M.; Augustynowicz, A. & Liwo, A., A general method for the derivation of the  
583 functional forms of the effective energy terms in coarse-grained energy functions of polymers. I. Backbone  
584 potentials of coarse-grained polypeptide chains.*J. Chem. Phys.* (2017). 146,
- 585 43. Zhang, Y. & Skolnick, J., Scoring function for automated assessment of protein structure template  
586 quality.*Proteins.* (2004). 57, 702-710.
- 587 44. Heinig, M. & Frishman, D., STRIDE: A web server for secondary structure assignment from known atomic  
588 coordinates of proteins.*Nucleic Acids Res.* (2004). 32, W500-W502.
- 589 45. Perlenfein, T.J.; Mehlhoff, J.D. & Murphy, R.M., Insights into the mechanism of cystatin C oligomer and  
590 amyloid formation and its interaction with beta-amyloid.*J. Biol. Chem.* (2017). 292, 11485-11498.
- 591 46. Kokalj, S.J.; Guncar, G.; Stern, I.; Morgan, G.; Rabzelj, S.; Kenig, M.; Staniforth, R.A.; Waltho, J.P.; Zerovnik,  
592 E. & Turk, D., Essential role of proline isomerization in stefin B tetramer formation.*J Mol Biol.* (2007). 366,  
593 1569-1579.
- 594 47. Campioni, S.; Mannini, B.; Zampagni, M.; Pensalfini, A.; Parrini, C.; Evangelisti, E.; Relini, A.; Stefani, M.;  
595 Dobson, C.M.; Cecchi, C. & Chiti, F., A causative link between the structure of aberrant protein oligomers  
596 and their toxicity.*Nat. Chem. Biol.* (2010). 6, 140-147.
- 597 48. Lindgren, M.; Sorgjerd, K. & Hammarstrom, P., Detection and characterization of aggregates, prefibrillar  
598 amyloidogenic oligomers, and protofibrils using fluorescence spectroscopy.*Biophys. J.* (2005). 88, 4200-4212.
- 599 49. Miti, T.; Mulaj, M.; Schmit, J.D. & Muschol, M., Stable, metastable, and kinetically trapped amyloid  
600 aggregate phases.*Biomacromolecules.* (2015). 16, 326-335.
- 601 50. Plakoutsi, G.; Bemporad, F.; Calamai, M.; Taddei, N.; Dobson, C.M. & Chiti, F., Evidence for a mechanism  
602 of amyloid formation involving molecular reorganisation within native-like precursor aggregates.*J. Mol.*  
603 *Biol.* (2005). 351, 910-922.
- 604 51. Abramoff, M.D.; Magalhaes, P.J. & Ram, S.J., Image processing with ImageJ.*Biophotonics Int.* (2004). 11,  
605 36-42.
- 606 52. Nečas, D. & Klapetek, P., Gwyddion: An open-source software for SPM data analysis.*Cent. Eur. J.*  
607 *Phys.* (2012). 10, 181-188.
- 608 53. Roessle, M.W.; Klaering, R.; Ristau, U.; Robrahn, B.; Jahn, D.; Gehrman, T.; Konarev, P.; Round, A.;  
609 Fiedler, S.; Hermes, C. & Svergun, D., Upgrade of the small-angle X-ray scattering beamline X3 at the  
610 European Molecular Biology Laboratory, Hamburg.*J. Appl. Crystallogr.* (2007). 40, S190-S194.
- 611 54. Round, A.R.; Franke, D.; Moritz, S.; Huchler, R.; Fritsche, M.; Malthan, D.; Klaering, R.; Svergun, D.I.  
612 & Roessle, M., Automated sample-changing robot for solution scattering experiments at the  
613 EMBL Hamburg SAXS station X33.*J. Appl. Crystallogr.* (2008). 41, 913-917.



- 614 55. Konarev, P.V.; Volkov, V.V.; Sokolova, A.V.; Koch, M.H.J. &Svergun, D.I., Primus: A windows PC-based  
615 system for small-angle scattering data analysis.*J. Appl. Crystallogr.*(2003). 36, 1277-1282.
- 616 56. Petoukhov, M.V.; Franke, D.; Shkumatov, A.V.; Tria, G.; Kikhney, A.G.; Gajda, M.; Gorba, C.; Mertens,  
617 H.D.T.; Konarev, P.V. &Svergun, D.I., New developments in the ATSAS program package for small-angle  
618 scattering data analysis.*J. Appl. Crystallogr.*(2012). 45, 342-350.
- 619 57. Case, D.A.; Cheatham, T.E.; Darden, T.; Gohlke, H.; Luo, R.; Merz, K.M.; Onufriev, A.; Simmerling, C.;  
620 Wang, B. &Woods, R.J., The Amber biomolecular simulation programs.*J. Comput. Chem.*(2005). 26,  
621 1668-1688.
- 622 58. Case, D.A.; Darden, T.A.; Cheatham, T.E.; Simmerling, C.L.; Wang, J.; Duke, R.E.; Luo, R.; Walker, R.C.;  
623 Zhang, W.; Merz, K.M.; Roberts, S.; Hayik, S.; Roitberg, A.; Seabra, G.; Swails, J.; Gotz, A.W.; Kolossvary,  
624 I.; Wong, K.F.; Paesani, F.; Vanicek, J.; Wolf, R.M.; Liu, J.; Wu, X.; Brozell, S.R.; Steinbrecher, T.; Gohlke, H.;  
625 Cai, Q.; Ye, X.; Want, J.; Hsieh, M.-J.; Cui, G.; Roe, D.R.; Mathews, D.H.; Seetin, M.G.; Salomon-Ferrer, R.;  
626 Sagui, C.; Babin, V.; Luchko, T.; Gusarov, S.; Kovalenko, A. &Kollman, P.A., *Amber 12*, University of  
627 California, San Francisco. 2012.
- 628 59. Hawkins, G.D.; Cramer, C.J. &Truhlar, D.G., Pairwise solute descreening of solute charges from a  
629 dielectric medium.*Chem. Phys. Lett.*(1995). 246, 122-129.
- 630 60. Hawkins, G.D.; Cramer, C.J. &Truhlar, D.G., Parametrized models of aqueous free energies of solvation  
631 based on pairwise descreening of solute atomic charges from a dielectric medium.*J. Phys. Chem.*(1996). 100,  
632 19824-19839.
- 633 61. Tsui, V. &Case, D.A., Theory and applications of the generalized born solvation model in macromolecular  
634 simulations.*Biopolymers.* (2001). 56, 275-291.
- 635 62. Berendsen, H.J.C.; Postma, J.P.M.; Vangunsteren, W.F.; Dinola, A. &Haak, J.R., Molecular-dynamics with  
636 coupling to an external bath.*J. Chem. Phys.*(1984). 81, 3684-3690.
- 637 63. Maisuradze, G.G.; Senet, P.; Czaplewski, C.; Liwo, A. &Scheraga, H.A., Investigation of protein folding by  
638 coarse-grained molecular dynamics with the unres force field.*J. Phys. Chem. A.* (2010). 114, 4471-4485.
- 639 64. Sieradzan, A.K.; Scheraga, H.A. &Liwo, A., Determination of effective potentials for the stretching of  
640 C-alpha center dot center dot center dot C-alpha virtual bonds in polypeptide chains for coarse-grained  
641 simulations of proteins from *ab initio* energy surfaces of N-methylacetamide and N-acetylpyrrolidine.*J.*  
642 *Chem. Theory Comput.* (2012). 8, 1334-1343.

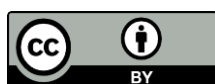

© 2020 by the authors. Submitted for possible open access publication under the terms and conditions of the Creative Commons Attribution (CC BY) license (<http://creativecommons.org/licenses/by/4.0/>).
